# Supplementary material for: Combined effects of biochar and chicken manure on maize (Zea mays L.) growth, lead uptake and soil enzyme activities under lead stress
Source: PeerJ. 2021 Jul 12;9:e11754. doi: 10.7717/peerj.11754 (PMC8280880; doi:10.7717/peerj.11754)
Supplement: Supplemental Information 1 — CK, LB, HB, LM, HM, BM represent the control, biochar application of 20 g·kg−1 soil, biochar application of 40 g·kg−1 soil, chicken manure application of 20 g·kg−1 soil, chicken manure application of 40 g·kg−1 soil, a combination of biochar and chicken manure (each at 20 g·kg−1 soil), respectively. Values are means (±SD) of four replicates; different lowercase letters indicate significant differences among different soil amendment treatments according to LSD at P < 0.05 [file peerj-09-11754-s001.xlsx]

## Sheet: Sheet1
Table S1 Plant height and dry weight of maize grown at lead (Pb) contaminated soil of 800 mg·kg-1
Plant height of maize (cm)					Dry weight of maize (g)
Treatment	1	2	3	4	Treatment	1	2	3	4
CK	32.58	33.6	32.02	35.32	CK	7.88	6.92	6.47	7.99
LB	43.28	40.56	39.12	41.88	LB	10.31	8.88	9.47	8.99
HB	43.25	41.79	40.32	42.88	HB	10.25	8.88	9.89	8.99
LM	45.39	46.78	43.19	46.84	LM	12.32	10.83	10.27	10.99
HM	48.77	45.67	48.19	48.88	HM	12.25	12.99	12.27	11.07
BM	49.99	46.59	50.03	47.01	BM	13.34	12.87	12.68	10.72
