# Supplementary material for: Combined effects of biochar and chicken manure on maize (Zea mays L.) growth, lead uptake and soil enzyme activities under lead stress
Source: PeerJ. 2021 Jul 12;9:e11754. doi: 10.7717/peerj.11754 (PMC8280880; doi:10.7717/peerj.11754)
Supplement: Supplemental Information 2 — CK, LB, HB, LM, HM, BM represent the control, biochar application of 20 g·kg−1 soil, biochar application of 40 g·kg−1 soil, chicken manure application of 20 g·kg−1 soil, chicken manure application of 40 g·kg−1 soil, a combination of biochar and chicken manure (each at 20 g·kg−1 soil), respectively. Values are means (±SD) of four replicates; different lowercase letters indicate significant differences among different soil amendment treatments according to LSD at P < 0.05 [file peerj-09-11754-s002.xlsx]

## Sheet: Sheet1
TableS2 Malondialdehyde (MDA) contents and activities of superoxide dismutase (SOD), peroxidases (POD), catalase (CAT) in maize leaves grown at Pb contaminated soil of 800 mg·kg-1
MDA contents (mmol g-1 FW )								SOD activities ( U g-1 FW )
Treatment	1	2	3	4			Treatment	1	2	3	4
CK	12.58	13.39	12.42	13.26			CK	100.34	107.39	96.41	95.26
LB	10.57	11.05	10.02	9.06			LB	113.38	101.25	116.41	114.21
HB	10.51	9.01	9.09	9.11			HB	130.84	124.25	118.47	132.11
LM	9.43	9.05	9.84	8.11			LM	135.56	128.97	132.47	123.89
HM	8.83	8.25	8.51	8.11			HM	145.58	155.91	150.17	144.89
BM	7.95	8.15	7.78	7.63			BM	164.13	161.33	172.17	174.89
CAT activities (U g-1 min-1 FW)								POD activities (U g-1 min-1 FW )
Treatment	1	2	3	4			Treatment	1	2	3	4
CK	1.05	1.15	1.27	1.32			CK	96.25	95.11	83.21	84.33
LB	1.58	1.64	1.45	1.33			LB	110.22	109.14	95.21	94.33
HB	1.79	1.83	1.6	1.49			HB	119.89	107.18	121.23	113.37
LM	2.13	1.85	2.06	1.72			LM	136.85	119.23	120.25	137.18
HM	2.23	2.56	2.26	2.59			HM	148.34	153.23	137.25	136.29
BM	2.68	2.49	2.36	2.78			BM	140.54	162.23	165.28	137.49
