# Supplementary material for: Combined effects of biochar and chicken manure on maize (Zea mays L.) growth, lead uptake and soil enzyme activities under lead stress
Source: PeerJ. 2021 Jul 12;9:e11754. doi: 10.7717/peerj.11754 (PMC8280880; doi:10.7717/peerj.11754)
Supplement: Supplemental Information 3 [file peerj-09-11754-s003.xlsx]

## Sheet: Sheet1
Table S3 Pb concentrations in roots , leaves and stems of maize grown at Pb contaminated soil of 800 mg·kg-1
Pb concentrations in roots (mg kg-1 DW )							Pb concentrations in leaves (mg kg-1 DW )							Pb concentrations in stems (mg kg-1 DW )
Treatment	1	2	3	4			Treatment	1	2	3	4			Treatment	1	2	3	4
CK	148.56	150.21	139.25	142.49			CK	53.47	46.69	49.29	54.12			CK	87.23	81.87	85.18	70.52
LB	96.57	101.24	91.25	88.49			LB	23.02	28.29	22.29	27.18			LB	35.68	39.79	32.47	39.98
HB	100.23	87.87	98.56	90.52			HB	20.02	16.71	21.21	21.14			HB	29.45	35.82	31.47	34.91
LM	111.84	99.89	102.56	109.58			LM	33.62	28.79	32.97	29.98			LM	47.72	45.81	41.11	43.45
HM	98.23	91.87	96.16	90.52			HM	20.23	16.41	20.49	21.35			HM	37.71	46.82	37.12	38.32
BM	64.47	70.62	63.16	69.12			BM	10.97	13.21	11.75	13.29			BM	28.34	30.32	23.34	24.31
