# Supplementary material for: Combined effects of biochar and chicken manure on maize (Zea mays L.) growth, lead uptake and soil enzyme activities under lead stress
Source: PeerJ. 2021 Jul 12;9:e11754. doi: 10.7717/peerj.11754 (PMC8280880; doi:10.7717/peerj.11754)
Supplement: Supplemental Information 4 [file peerj-09-11754-s004.xlsx]

## Sheet: Sheet1
Table S4 Soil available Pb concentrations and pH values at Pb contaminated soil of 800 mg·kg-1
Soil available Pb concentrations (mg kg-1)							pH values
Treatment	1	2	3	4			Treatment	1	2	3	4
CK	138.57	130.93	139.48	123.86			CK	7.72	7.88	7.82	7.74
LB	106.31	110.93	100.12	96.93			LB	8.23	8.37	8.15	8.09
HB	85.31	81.95	76.89	77.83			HB	8.49	8.38	8.58	8.25
LM	119.71	120.93	106.78	113.86			LM	7.63	7.58	7.47	7.59
HM	97.71	91.94	88.79	94.88			HM	7.62	7.55	7.43	7.41
BM	66.71	60.35	65.47	64.87			BM	7.67	8.35	8.46	7.21
