# Supplementary material for: Combined effects of biochar and chicken manure on maize (Zea mays L.) growth, lead uptake and soil enzyme activities under lead stress
Source: PeerJ. 2021 Jul 12;9:e11754. doi: 10.7717/peerj.11754 (PMC8280880; doi:10.7717/peerj.11754)
Supplement: Supplemental Information 5 [file peerj-09-11754-s005.xlsx]

## Sheet: Sheet1
Table S5 Bioconcentration factors (BCF) and transfer factors (TF) of maize grown at Pb contaminated soil of 800 mg·kg-1
	Bioconcentration factors						transfer factors
Treatment	1	2	3	4			Treatment	1	2	3	4
CK	0.0749	0.0743	0.0712	0.0701			CK	0.4223	0.3828	0.4035	0.4003
LB	0.0359	0.0364	0.0311	0.0301			LB	0.2779	0.3178	0.2837	0.3039
HB	0.0309	0.0314	0.0272	0.0278			HB	0.2772	0.3074	0.2828	0.2869
LM	0.0389	0.0391	0.0412	0.0431			LM	0.3089	0.3178	0.3137	0.2934
HM	0.0369	0.0366	0.03321	0.0319			HM	0.2973	0.3076	0.2822	0.2861
BM	0.0242	0.0229	0.0212	0.0211			BM	0.2571	0.2838	0.2612	0.2543
