# Supplementary material for: Combined effects of biochar and chicken manure on maize (Zea mays L.) growth, lead uptake and soil enzyme activities under lead stress
Source: PeerJ. 2021 Jul 12;9:e11754. doi: 10.7717/peerj.11754 (PMC8280880; doi:10.7717/peerj.11754)
Supplement: Supplemental Information 6 [file peerj-09-11754-s006.xlsx]

## Sheet: Sheet1
Table S6 Soil enzyme activities of sucrase, urease and catalase of maize grown at Pb contaminated soil of 800 mg·kg-1
Soil enzyme activities of sucrase(mg g-1 24h-1）						Soil enzyme activities of urease(mg g-1 24h-1)						Soil enzyme activities of catalase ( mL g-1)
Treatment	1	2	3	4		Treatment	1	2	3	4		Treatment	1	2	3	4
CK	16.68	19.84	17.19	16.53		CK	0.3603	0.3607	0.4012	0.4203		CK	1.49	1.47	1.35	1.33
LB	25.27	22.84	24.27	23.13		LB	0.4678	0.4709	0.4211	0.4531		LB	1.61	1.68	1.79	1.82
HB	28.57	27.89	26.79	26.87		HB	0.4678	0.5105	0.4501	0.4925		HB	1.91	2.09	1.91	2.05
LM	24.77	25.89	24.51	23.87		LM	0.5312	0.4805	0.5001	0.5843		LM	1.58	1.65	1.74	1.55
HM	28.45	27.89	26.88	28.34		HM	0.5468	0.5812	0.5143	0.5767		HM	1.89	1.92	1.82	1.79
BM	29.61	32.69	29.98	31.34		BM	0.6361	0.5815	0.6148	0.6557		BM	2.31	2.39	2.28	2.38
